# Supplementary material for: High Fecal Contamination and High Levels of Antibiotic-Resistant Enterobacteriaceae in Water Consumed in the City of Maputo, Mozambique
Source: MDPI journal article supplement (doi:10.3390/biology10060558), 2021-06-20
Supplement: s1 [file s1]

## Supplementary material

Table S1. List and evaluation intervals of the antibiotics used, according to CLSI (2017) criteria

| Type of antibiotic | Antibiotic                                  | Inhibition halo diameter (mm) |              |           |
|--------------------|---------------------------------------------|-------------------------------|--------------|-----------|
|                    |                                             | Susceptible                   | Intermediate | Resistant |
| Beta - lactams     | Amoxicillin (AMX) 10 mg                     | >17                           | 14-16        | ≤13       |
|                    | Amoxicillin/Clavulanic acid (AMC) 30:10 mg  | >18                           | 14-17        | ≤13       |
|                    | Ceftazidime (CAZ) 30 mg                     | >21                           | 18-20        | ≤17       |
|                    | Imipenem (IPM) 10 mg                        | >23                           | 20-22        | ≤19       |
|                    | Cefpirome (CPO) 30 mg                       | >18                           | #            | ≤14       |
|                    | Aztreonam (ATM) 30 mg                       | >21                           | 18-20        | ≤17       |
|                    | Cefoxitin (FOX) 30 mg                       | >17                           | 15-17        | ≤14       |
|                    | Ampicillin AMP 10 mg                        | >17                           | 14-16        | ≤13       |
|                    | Cefotaxime (CTX) 30 mg                      | >26                           | 23-25        | ≤22       |
| Non-beta-lactams   | Chloramphenicol (CHL) 30 mg                 | >18                           | 13-17        | ≤12       |
|                    | Tetracycline (TET) 30 mg                    | >15                           | 12-14        | ≤11       |
|                    | Gentamicin (GEN) 10 mg                      | >15                           | 13-14        | ≤12       |
|                    | Trimethoprim/Sulfamethoxazole (SXT) 1:19 mg | >16                           | 11-15        | ≤10       |
|                    | Azithromycin (AZM) 15 mg                    | >13                           | #            | ≤12       |
|                    | Ciprofloxacin (CIP) 5 mg                    | >21                           | 16-20        | ≤15       |

# The guidelines of CCLS [22] do not show the intermediate range for this antibiotic

Table S2. Antibiotic resistance profiles of 44 isolates of *Enterobacteriaceae*

| Type of antibiotic | Antibiotic*     | <i>E. coli</i> (n = 28) |                 | <i>Klebsiella</i> spp. (n = 16) |                 |
|--------------------|-----------------|-------------------------|-----------------|---------------------------------|-----------------|
|                    |                 | Susceptible             | Non-Susceptible | Susceptible                     | Non-Susceptible |
| beta-lactams       | AMX (10 µg)     | 18 (64.3%)              | 10 (35.7%)      | 7 (43.8)                        | 9 (56.3)        |
|                    | AMC (20/10 µg)  | 24 (85.7%)              | 4 (14.3%)       | 6 (37.5)                        | 10 (62.5)       |
|                    | CAZ (30 µg)     | 25 (89.3%)              | 3 (10.7%)       | 14 (87.5)                       | 2 (12.5)        |
|                    | IPM (10 µg)     | 17 (60.7%)              | 11 (39.3%)      | 7 (43.8)                        | 9 (56.3)        |
|                    | CPO (30 µg)     | 28 (100%)               | 0               | 14 (87.5)                       | 2 (12.5)        |
|                    | ATM (30 µg)     | 27 (96.4%)              | 1 (3.6%)        | 12 (75)                         | 4 (25)          |
|                    | FOX (30 µg)     | 23 (81.1%)              | 5 (17.8%)       | 9 (56.3)                        | 7 (43.8)        |
|                    | AMP (10 µg)     | 15 (53.6%)              | 13 (46.4%)      | 8 (50)                          | 8 (50)          |
|                    | CTX (30 µg)     | 25 (89.3%)              | 3 (10.7%)       | 9 (56.3)                        | 7 (43.8)        |
| Non-beta-lactams   | CHL (30 µg)     | 22 (78.6%)              | 6 (21.4%)       | 15 (93.8)                       | 1 (6.3)         |
|                    | TET (30 µg)     | 14 (50%)                | 14 (50%)        | 6 (37.5)                        | 10 (62.5)       |
|                    | GEN (10 µg)     | 25 (89.3%)              | 3 (10.7%)       | 12 (75)                         | 4 (25)          |
|                    | SXT             |                         | 11 (39.3%)      |                                 | 3 (18.8)        |
|                    | (23,75/1,25 µg) | 17 (60.7%)              |                 | 13 (81.3)                       |                 |
|                    | AZM (15 µg)     | 24 (85.7%)              | 4 (14.3%)       | 11 (68.8)                       | 5 (31.3)        |
|                    | CIP (5 µg)      | 28 (100%)               | 0               | 14 (87.5)                       | 2 (12.5)        |

\*Amoxicillin (AMX) 10 mg; amoxicillin/clavulanic acid (AMC) 30:10 mg; ceftazidime (CAZ) 30 mg; imipenem (IPM) 10 mg; cefpirome (CPO) 30 mg; aztreonam (ATM) 30 mg; cefoxitin (FOX) 30 mg; ampicillin (AMP) 10 mg; cefotaxime (CTX) 30 mg; chloramphenicol (CHL) 30 mg; tetracycline (TET) 30 mg, gentamycin (GEN) 10 mg, trimethoprim / sulfamethoxazole (SXT) 1:19 mg, azithromycin (AZM) 15 mg; ciprofloxacin (CIP) 5 mg.
